# Supplementary material for: Missing checkerboards? An absence of competitive signal in Alnus-associated ectomycorrhizal fungal communities
Source: PubMed Central journal article supplement (PMC4273934; doi:10.7717/peerj.686), 2014-12-16

Figure S1. Root density in the three research plots. Plot 2 = 268 stems/ha, Plot 4 = 1557, Plot 8 = 3559. Values based on ten replicate 1 cubic liter soil cores taken throughout each plot on 31 May, 2013. No significant differences were found (one-way ANOVA:  $F = 0.14$ ,  $DF = 2,27$ ,  $P = 0.869$ ).

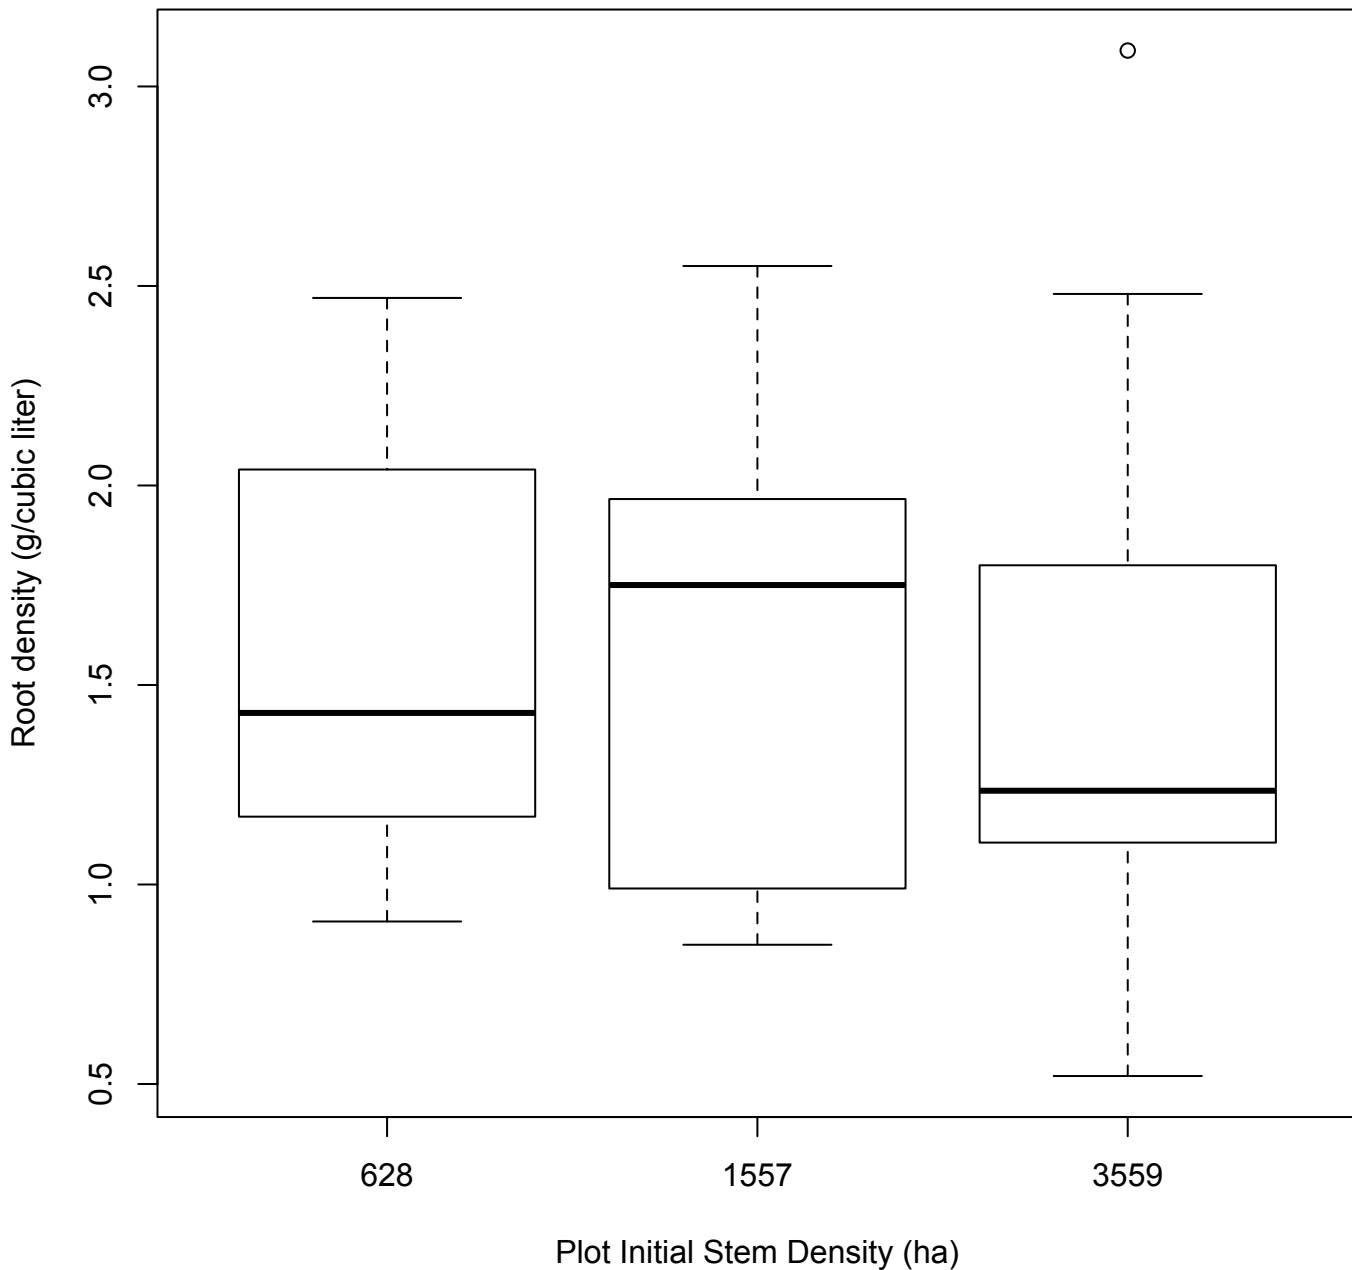

Supplement: peerj-02-686-s001.pdf [file peerj-02-686-s001.pdf]
