# Supplementary material for: Missing checkerboards? An absence of competitive signal in Alnus-associated ectomycorrhizal fungal communities
Source: PubMed Central journal article supplement (PMC4273934; doi:10.7717/peerj.686), 2014-12-16

Figure S2. Mantel correlogram of Plot2 Alnus dataset.

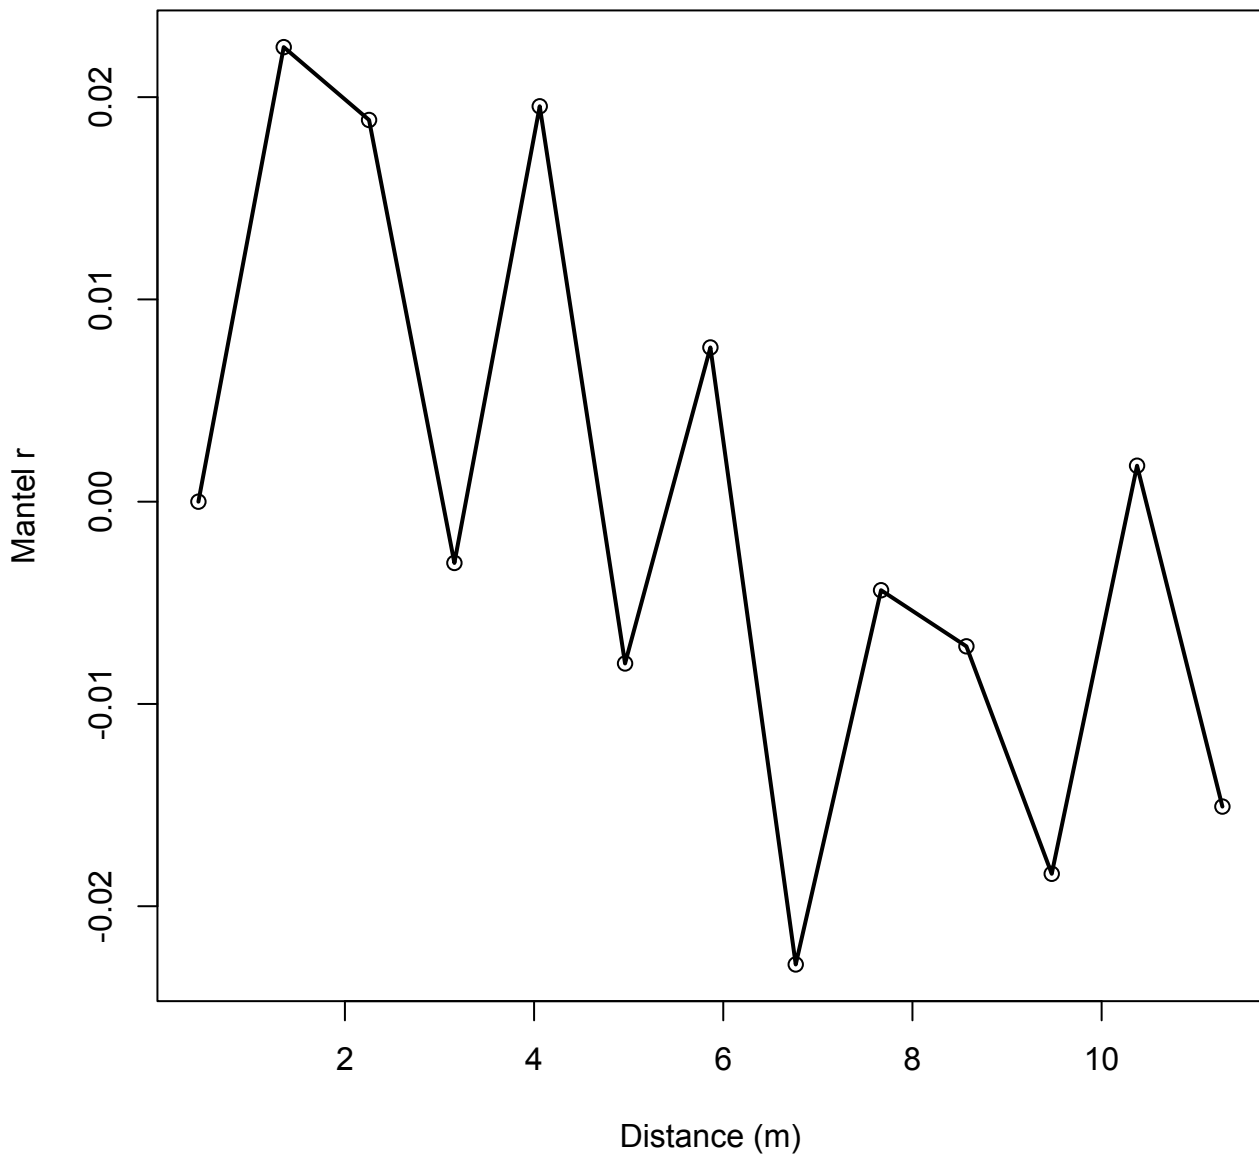

Supplement: peerj-02-686-s002.pdf [file peerj-02-686-s002.pdf]
