# Supplementary material for: Missing checkerboards? An absence of competitive signal in Alnus-associated ectomycorrhizal fungal communities
Source: PeerJ. 2014 Dec 16;2:e686. doi: 10.7717/peerj.686 (PMC4273934; doi:10.7717/peerj.686)
Supplement: Table S2 — Frequency represents the occurrence of that ECM fungal taxon among all the bags. AlnusMatch refers to whether the OTU matches to previously known Alnus ECM fungal samples. MatchID#, Match%, MatchTaxon, and MatchLocality refers to the BLAST matches of that OTU to a particular OTU in GenBank and the geographic location from which the GenBank accession was found. For the root tip data, the number of sequences is normalized to match the bag data (i.e., the total root tip sequences per taxon/192). [file peerj-02-686-s005.xlsx]

## Sheet: Sheet1
Table S2. An OTU x sample matrix showing all of the bag samples and the one root tip sample from this study. Frequency represents the occurrence of that ECM fungal taxon among all the bags. AlnusMatch refers to whether the OTU matches to previously known Alnus ECM fungal samples. MatchID#, Match%, MatchTaxon, and MatchLocality refers to the BLAST matches of that OTU to a particular OTU in GenBank…
											#QIIMEID	roots	plot2.101	plot2.102	plot2.103	plot2.104	plot2.105	plot2.106	plot2.107	plot2.108	plot2.109	plot2.110	plot2.111	plot2.112	plot2.113	plot2.114	plot2.115	plot2.116	plot2.117	plot2.118	plot2.119	plot2.120	plot2.121	plot2.122	plot2.123	plot2.124	plot2.125	plot2.126	plot2.127	plot2.128	plot2.129	plot2.130	plot2.131	plot2.132	plot2.133	plot2.134	plot2.135	plot2.136	plot2.137
											Plot#	plot4	plot2	plot2	plot2	plot2	plot2	plot2	plot2	plot2	plot2	plot2	plot2	plot2	plot2	plot2	plot2	plot2	plot2	plot2	plot2	plot2	plot2	plot2	plot2	plot2	plot2	plot2	plot2	plot2	plot2	plot2	plot2	plot2	plot2	plot2	plot2	plot2	plot2
											Sample#	100	101	102	103	104	105	106	107	108	109	110	111	112	113	114	115	116	117	118	119	120	121	122	123	124	125	126	127	128	129	130	131	132	133	134	135	136	137
QIIMEOTU	TotalSequences	RankOrder	Frequency	AlnusMatch	Contaminant	MatchID#	Match%	MatchTaxon	MatchLocality	Name	Bag#	NA	bag201	bag202	bag203	bag204	bag205	bag206	bag207	bag208	bag209	bag210	bag211	bag212	bag213	bag214	bag215	bag216	bag217	bag218	bag219	bag220	bag221	bag222	bag223	bag224	bag225	bag226	bag227	bag228	bag229	bag230	bag231	bag232	bag233	bag234	bag235	bag236	bag237
denovo2325	209355	1	192	Yes	no	GQ398250	99.59	Tomentella OTU3	USA:OR	Tomentella3		168	174	891	669	992	1061	800	2681	1803	3217	966	732	1434	888	518	292	1770	663	1448	1092	640	623	874	469	703	819	794	2277	552	1036	3355	3086	839	854	850	1050	285	1715
denovo765	29897	2	192	Yes	no	GQ398241	98	Alnicola OTU1	USA:OR	Alnicola1		59	19	29	57	251	47	713	169	67	1380	14	33	101	296	158	110	31	188	43	80	23	30	86	38	1716	72	29	42	1835	47	19	47	80	74	68	91	14	47
denovo1625	5108	3	192	No	unknown	EF218829	95.53	uncultured Thelephoraceae	Canada:BC	Thelephoraceae1		0	6	24	30	23	16	39	22	33	12	12	35	25	28	23	13	13	19	36	37	20	11	35	27	24	40	5	14	25	21	18	22	41	30	37	32	11	15
denovo1491	4630	4	192	Yes	no	GQ398249	100	Tomentella OTU2	USA:OR	Tomentella2		34	3	6	17	14	10	7	7	13	5	7	16	36	15	15	11	11	10	26	28	11	10	20	13	26	22	12	388	13	16	11	58	17	20	17	47	12	20
denovo2091	1710	5	178	Yes	no	GQ398243	99.52	Cortinarius OTU1	USA:OR	Cortinarius1		19	0	2	1	3	5	4	4	9	4	1	4	3	22	4	2	0	1	6	4	1	1	9	7	1	3	1	1	2	2	9	8	4	10	4	3	1	1
denovo1486	1382	6	148	Yes	no	GQ398246	99.22	Lactarius obscuratus	USA:OR	Lactarius1		15	0	55	0	0	2	1	1	0	0	0	4	1	6	1	0	1	2	0	3	0	0	2	2	3	1	0	0	0	1	2	0	0	4	0	8	0	1
denovo2802	1363		190	No	yes	GQ268590	98.13	uncultured Boletaceae	Malaysia:Sarawak	Boletaceae2		0	0	7	5	6	5	6	15	19	5	4	6	6	9	8	7	6	2	6	6	4	7	9	8	5	8	10	4	5	10	11	10	12	7	64	10	2	3
denovo2485	775	7	177	No	unknown	GQ268649	91.29	uncultured Russula	Malaysia:Sarawak	Russula15		0	0	3	4	4	4	10	5	18	1	1	3	1	5	9	2	4	7	3	3	1	6	16	6	10	3	1	3	0	5	6	3	11	8	24	6	4	3
denovo2790	662	8	111	Yes	no	GQ398249	99.16	Tomentella OTU1	USA:OR	Tomentella1		10	1	1	1	5	1	0	2	0	0	0	0	0	0	0	3	1	1	0	0	2	1	2	3	4	0	0	0	0	0	0	1	0	1	2	4	0	3
denovo740	614	9	176	No	unknown	JQ967280	83.18	Phylloporus sp HKAS 74689	China:Hainan	Phylloporus3		0	1	1	4	4	7	7	5	0	2	0	2	5	1	1	1	1	2	5	1	1	1	6	3	2	1	0	9	6	1	3	0	0	1	9	30	1	2
denovo609	561	10	164	No	unknown	JQ967280	97.63	Phylloporus sp HKAS 74689	China:Hainan	Phylloporus2		0	0	1	6	0	5	1	2	3	0	0	1	5	4	0	1	4	2	5	4	1	2	6	5	1	6	0	2	3	1	4	0	5	7	2	6	1	1
denovo690	464	11	157	No	unknown	KF477059.1	95	Piloderma sp.	USA:OR	Piloderma3		0	0	2	0	2	5	1	3	1	1	1	3	0	0	1	2	4	1	2	4	2	3	2	4	6	0	6	2	3	0	2	1	4	1	5	5	1	1
denovo2279	420	12	147	No	unknown	AF418641	85.17	Russula lepida	NA	Russula6		0	0	1	2	3	2	7	2	6	0	0	0	0	6	2	3	2	3	6	4	3	3	4	1	7	1	2	3	0	6	3	3	3	4	19	5	2	3
denovo1286	405	13	143	No	unknown	FJ039566	98.08	Cortinarius duracinus	Canada	Cortinarius5		0	1	0	5	5	0	5	1	0	4	0	4	2	2	2	1	3	1	3	3	0	3	6	4	0	1	1	2	1	1	0	1	3	2	14	2	1	0
denovo1048	356	14	135	No	unknown	EU625830	87.45	uncultured Tomentella	USA:MD	Tomentella15		0	0	2	6	4	2	2	4	2	1	1	0	0	4	2	0	2	1	2	1	1	2	5	2	1	4	1	1	4	1	0	2	1	0	2	7	1	1
denovo2746	335	15	143	No	unknown	JF748067	97.01	uncultured Thelephoraceae	China	Thelephoraceae5		0	0	2	1	1	3	4	3	8	0	1	1	0	2	3	0	1	1	0	1	2	1	0	2	4	0	0	3	1	0	2	1	0	4	3	2	1	4
denovo2456	302	16	126	No	unknown	FJ210774.1	89	Tomentella sp. - ECM root-tips	Australia	UnculturedFungus7		0	0	0	4	2	2	5	2	1	2	0	1	0	0	1	1	2	0	1	2	0	0	2	0	1	2	0	0	0	0	0	3	1	2	0	0	1	2
denovo1911	297	17	122	No	unknown	NA	98.26	44 AL1 C5.5 DOB940 no.216 piloderma aff.olivaceum	USA:AK	Piloderma1		0	0	2	1	0	1	1	1	3	0	0	2	2	1	0	2	1	2	2	0	0	2	6	1	2	4	0	0	1	1	6	5	0	1	6	4	3	0
denovo2965	277	18	122	No	unknown	GU222314	83.99	Amanita australis	New Zealand	Amanita1		0	0	0	2	1	2	10	0	2	1	0	1	2	0	2	5	5	1	2	2	3	1	4	1	3	1	3	0	0	1	4	1	4	4	13	1	1	1
denovo1903	260	19	118	No	unknown	GQ268672	90.57	uncultured Tomentella	Malaysia:Sarawak	Tomentella25		0	0	2	0	0	2	8	0	6	1	1	1	1	1	1	3	2	1	1	7	0	3	4	3	2	2	1	4	0	0	3	3	2	2	4	3	2	0
denovo254	254	20	111	No	unknown	HQ157926.1	99	Meliniomyces bicolor	Canada	Helotiales1		0	0	1	1	3	1	1	0	0	0	0	1	2	2	3	1	3	0	7	1	0	1	3	0	0	3	1	2	0	0	0	2	1	0	3	6	2	0
denovo1467	246	21	118	No	unknown	EU668216	93.06	uncultured Tomentella	United Kingdom:England	Tomentella20		0	0	1	0	2	2	0	4	6	0	0	2	3	0	1	1	1	0	0	1	1	0	2	3	4	1	1	1	0	1	2	0	2	2	9	3	1	3
denovo1086	241	22	113	No	unknown	EU598200	99.15	Lactarius deceptivus	USA:TN	Lactarius3		0	0	0	3	0	0	0	0	2	0	0	5	0	1	4	0	1	1	1	5	1	2	2	0	2	0	0	0	0	1	3	3	2	0	4	0	0	0
denovo1250	226		97	No	yes	GQ268666	98.74	uncultured Tomentella	Malaysia:Sarawak	Tomentella18		0	0	0	0	0	3	0	0	0	0	0	0	2	0	0	0	0	0	0	0	0	0	0	0	0	1	0	1	0	0	0	1	0	0	1	0	0	0
denovo2106	226	23	108	No	unknown	FJ554364.1	97.17	Amphinema sp.	USA:AK	Amphinema4		0	0	1	0	0	0	1	1	4	1	0	3	0	0	0	0	1	0	3	3	0	1	1	0	3	0	0	4	0	0	0	0	0	4	0	1	0	0
denovo622	196	25	99	No	unknown	GU258263	79.2	Lactarius subgerardii	USA	Lactarius6		0	0	0	2	1	0	0	2	3	0	0	1	1	3	1	1	0	0	0	2	1	1	5	0	2	1	0	0	0	3	1	0	2	4	1	0	0	1
denovo1727	196	24	75	Yes	no	GQ398244	99.51	Cortinarius OTU2	USA:OR	Cortinarius2		1	0	2	0	0	0	0	0	0	0	0	0	0	0	0	0	1	0	2	3	0	0	0	2	5	4	2	3	1	1	0	0	1	8	1	0	0	0
denovo1461	182	26	90	No	unknown	HM017844	98.62	Cortinarius uraceus	Finland	Cortinarius9		0	0	1	0	0	1	0	1	3	1	0	0	1	0	0	0	0	2	0	0	0	0	4	2	4	3	0	0	1	0	1	1	0	2	2	2	0	4
denovo824	180	27	95	No	unknown	KF477076.1	100	Piloderma sp.	USA:TN	Piloderma4		0	1	0	0	1	0	2	0	3	0	0	0	2	0	0	0	1	0	2	1	1	0	0	0	2	1	1	2	3	0	0	1	3	1	2	0	0	0
denovo1507	164	28	95	No	unknown	AY878660	89.06	uncultured Russula	USA:CA	Russula11		0	0	2	0	1	0	0	1	0	0	0	0	0	0	2	0	0	1	2	0	1	2	0	0	7	1	3	1	0	0	1	0	2	3	2	1	0	0
denovo172	163	29	92	No	unknown	JQ902057	86.25	Russula compressa	Madagascar	Russula3		0	0	1	1	0	0	0	0	2	1	0	2	0	0	0	0	0	0	2	3	0	4	2	0	0	1	0	0	2	0	0	0	1	1	2	0	0	0
denovo1744	150	30	77	No	unknown	F748111.1	88	Tomentella sp.	China	UnculturedECM4		0	0	0	2	0	1	1	0	3	0	0	1	0	8	4	1	0	0	1	0	0	0	0	0	4	3	2	1	0	0	2	0	2	1	1	0	0	0
denovo409	139		84	No	yes	GQ268592	98.83	uncultured Clavulinaceae	Malaysia:Sarawak	Clavulinaceae2		0	0	1	1	1	1	1	0	1	0	0	1	0	0	0	2	1	1	0	0	1	0	2	0	0	1	1	1	1	0	0	0	2	0	1	1	0	2
denovo1908	139	31	91	No	unknown	KF000442.1	95	Sebacina epigaea	USA:CA	Sebacinaceae2		0	1	0	0	0	1	0	1	0	2	0	1	1	0	0	2	1	5	1	1	1	0	1	0	0	0	0	2	1	0	0	1	3	1	4	1	1	0
denovo1753	135	32	67	No	unknown	EU625804	93	uncultured Tomentella	USA:MD	Tomentella24		0	0	0	2	1	1	0	0	0	1	0	0	2	0	1	0	0	1	0	2	2	0	2	0	1	1	0	0	0	2	0	0	1	0	30	0	0	1
denovo2457	134	33	72	No	unknown	KF000464.1	97	Sebacina flagelliformis	Germany	Sebacina5		0	1	0	0	1	0	0	2	0	0	0	0	0	0	0	0	0	0	3	0	0	1	0	1	2	0	0	0	0	0	0	0	2	0	4	0	0	1
denovo823	133	34	74	No	unknown	FJ845410	100	Hygrophorus olivaceoalbus	Canada:BC	Hygrophorus2		0	0	0	0	0	5	0	0	1	0	0	0	0	1	1	0	0	0	1	0	1	0	3	0	2	1	3	1	1	0	0	0	5	0	6	0	0	2
denovo1247	130	35	67	No	unknown	GU258287	80.43	Lactarius cf wirrabara DS 2011	New Zealand	Lactarius2		0	0	1	0	0	0	2	2	3	3	0	0	1	4	3	1	0	0	0	2	0	0	1	0	5	1	0	0	0	0	0	0	3	3	10	0	1	1
denovo2227	114		67	No	yes	GQ268667	99.15	uncultured Tomentella	Malaysia:Sarawak	Tomentella27		0	0	0	0	0	0	0	0	0	0	2	2	0	0	5	0	0	0	0	1	0	0	2	1	0	0	2	1	0	0	0	1	0	0	7	0	0	1
denovo2752	104	36	68	No	unknown	KC552020	82.07	Rhodactina incarnata	Thailand	Rhodactina1		0	1	2	1	0	0	0	0	0	0	0	0	0	0	1	0	1	1	2	2	1	0	2	0	0	0	0	0	0	0	0	0	2	2	0	0	0	0
denovo626	104	37	60	No	unknown	JF273543	85.44	Sebacinales sp EMF42	China:Dujiangyan	Sebacinales4		0	0	1	1	0	1	0	0	0	0	0	0	1	0	0	0	0	0	0	0	0	0	0	0	4	1	1	0	3	2	1	0	0	2	8	2	1	0
denovo2700	91	38	56	No	unknown	EF126734	95.62	Russula subnigricans	NA	Russula8		0	1	0	1	0	0	3	0	1	0	1	0	0	0	2	0	0	0	0	1	0	1	1	1	3	2	1	0	0	0	0	1	2	2	6	0	0	0
denovo1663	91	39	48	No	unknown	GQ268672	94.26	uncultured Tomentella	Malaysia:Sarawak	Tomentella23		0	0	2	0	0	0	3	0	0	0	0	0	0	0	0	0	0	0	2	0	1	2	2	0	0	0	1	0	0	0	0	0	1	2	0	0	2	1
denovo1531	90	40	44	No	unknown	EU625865	99.59	uncultured Tomentella	USA:MD	Tomentella21		0	0	0	0	0	0	0	2	0	0	0	0	0	0	2	0	1	0	0	1	0	0	0	0	0	0	0	1	0	0	0	0	1	0	0	1	0	0
denovo246	88	41	59	No	unknown	GQ268669	92.21	uncultured Tomentella	Malaysia:Sarawak	Tomentella28		0	0	0	1	0	0	1	1	0	0	0	1	0	2	2	1	0	0	0	1	0	0	2	1	1	0	1	0	0	1	0	0	1	0	1	0	1	0
denovo2843	85	42	51	No	unknown	JQ711917	98.77	Tomentella bryophila	Canada:BC	Tomentella4		0	0	0	0	0	1	0	0	2	0	0	0	1	0	0	0	0	0	0	0	0	0	0	0	0	1	0	0	0	0	0	0	0	0	0	1	0	0
denovo104	83	43	45	No	unknown	HQ604599	97.66	Inocybe praetervisa	Canada:BC	Inocybe6		0	0	0	0	0	2	0	0	0	0	0	0	2	0	0	0	0	0	1	2	0	0	0	0	0	0	0	0	0	0	0	3	0	1	1	2	0	0
denovo44	83	44	55	No	unknown	FN393106	98.76	uncultured Tomentella	France:Burgundy	Tomentella33		0	0	0	0	1	6	0	0	0	1	1	0	0	1	2	1	0	0	1	0	0	2	1	1	0	1	0	0	0	0	1	0	3	0	2	0	1	0
denovo882	82		61	No	yes	GQ268668	99.59	uncultured Tomentella	Malaysia:Sarawak	Tomentella34		0	0	0	0	0	0	0	0	0	0	0	1	1	0	0	0	1	0	0	2	1	1	1	0	2	1	0	0	0	0	0	0	2	0	2	1	1	0
denovo276	82	45	64	Yes	no	GQ398250	95.47	Tomentella OTU3	USA:OR	Tomentella7		0	0	1	0	0	1	0	1	0	0	0	0	0	0	1	0	1	0	0	0	1	0	0	0	0	0	0	7	0	0	0	1	0	1	0	0	0	0
denovo3041	81	46	47	No	unknown	EU625861	93.39	uncultured Tomentella	USA:MD	Tomentella31		0	0	0	1	2	0	0	1	3	0	0	0	0	0	0	1	0	0	0	1	0	0	3	0	1	0	0	0	0	0	0	0	0	1	0	4	0	0
denovo2086	74	47	46	No	unknown	UDB000737	99.64	Cortinarius glaucopus	Sweden:Uppsala	Cortinarius6		0	0	0	1	1	1	0	0	0	0	0	0	0	0	1	0	0	0	0	0	0	2	0	0	0	0	2	0	1	2	0	1	5	1	2	2	0	0
denovo660	71	48	44	No	unknown	KM576559.1	91	Russula sp.	Germany	Russulaceae4		0	0	0	0	0	0	0	0	0	0	0	0	0	0	2	0	2	0	0	0	0	1	0	1	0	0	0	0	0	0	0	1	1	0	0	0	0	0
denovo981	70		48	No	yes	GQ268633	96.96	uncultured Russulales	Malaysia:Sarawak	Russulales1		0	0	0	1	0	0	3	0	0	0	0	1	0	0	1	0	0	0	1	1	0	0	2	0	0	0	0	0	0	1	0	0	0	1	0	7	0	0
denovo2638	69	49	47	No	unknown	NR_119638.1	90.57	Tomentella agbassaensis	Africa	Thelephoraceae8		0	0	0	0	1	0	1	1	0	0	0	0	0	1	0	0	0	0	0	0	1	0	1	0	2	0	0	0	0	0	0	0	0	3	1	2	0	0
denovo556	68	50	42	No	unknown	FJ454925	94.67	uncultured Russulaceae	Thailand	Russulaceae3		0	0	1	0	2	0	1	0	1	0	0	0	0	1	1	0	0	1	0	0	0	0	0	0	0	0	0	1	0	0	0	0	2	0	0	0	0	0
denovo1400	67	51	46	No	unknown	JQ408761	99.63	Inocybe lanatodisca	USA:MA	Inocybe4		0	0	0	0	0	0	1	0	0	0	0	0	0	0	0	1	0	0	0	0	0	0	0	0	0	0	0	1	0	1	0	0	1	3	0	0	1	0
denovo1650	66	52	40	No	unknown	EU625861	91.8	uncultured Tomentella	USA:MD	Tomentella22		0	0	1	0	0	0	0	0	0	0	0	0	0	1	0	0	0	0	0	0	0	1	1	0	5	0	3	0	0	1	0	0	0	0	1	2	0	0
denovo2222	64	53	42	No	unknown	JF908273	96.92	Lactarius rubrocinctus	Italy	Lactarius4		0	0	1	1	2	0	0	0	0	0	0	0	1	0	0	2	0	0	0	2	1	0	1	2	0	0	0	0	0	0	0	0	0	1	0	1	0	0
denovo2531	64	54	37	No	unknown	NA	99.52	96 41 AL-2 A20 DOB 1003 No.95 sistotrema aff.alboluteum	USA:CA	Sistroterma1		0	0	0	0	0	0	1	3	0	0	0	0	3	0	0	0	0	0	0	0	2	0	1	0	0	1	2	0	0	1	0	0	0	0	0	0	0	2
denovo2719	62	55	39	No	unknown	KC455326.1	99	Inocybe sp.	USA:AK	Inocybe12		0	0	0	0	1	0	1	0	0	0	0	0	0	0	0	1	0	0	0	0	0	0	0	0	0	0	0	0	0	0	1	0	0	0	3	4	0	1
denovo1001	57		41	No	yes	GQ268586	99.67	uncultured Boletaceae	Malaysia:Sarawak	Boletaceae1		0	0	0	1	0	0	0	1	1	0	0	1	0	0	1	0	0	0	0	0	0	0	1	0	0	0	4	0	1	0	0	0	0	0	3	0	0	0
denovo887	57	56	34	Yes	no	GQ398250	92.68	Tomentella OTU3	USA:OR	Tomentella9		0	0	1	0	0	0	0	0	0	0	0	0	0	0	0	0	0	0	0	0	0	0	0	0	2	0	0	0	1	0	0	0	0	0	0	0	0	0
denovo702	56	57	38	No	unknown	GQ268548	90	uncultured Amanita	Malaysia:Sarawak	Amanita2		0	0	0	0	0	0	1	2	0	0	0	0	0	0	0	0	0	0	0	1	0	1	0	0	1	0	0	0	0	0	0	0	3	0	0	1	0	0
denovo2882	56	58	32	No	unknown	JX907821.1	96	Tylospora asterophora	USA:AK	Tylospora1		0	0	0	0	0	0	1	0	2	0	0	0	0	0	0	0	0	0	1	1	0	2	0	1	0	2	0	0	0	3	0	1	3	0	7	0	0	0
denovo2407	54	59	33	No	unknown	EU375708.1	99	Cantharellaceae	USA:IN	Cantharellaceae1		0	0	0	0	0	0	0	1	0	0	0	1	0	1	0	0	0	0	1	0	0	0	0	0	0	0	0	0	0	0	0	0	0	0	2	1	0	0
denovo1760	53	60	4	No	unknown	GU452518	100	uncultured Pyronemataceae - from ECM root-tip	Canada:BC	Pyronemataceae1		0	0	0	0	0	0	0	0	0	0	0	0	0	0	0	0	0	0	0	0	0	0	0	0	0	0	0	33	0	0	0	0	0	0	0	0	0	0
denovo2060	52	61	35	No	unknown	JF304399	99.12	uncultured Inocybe	NA	Inocybe9		0	0	0	0	0	0	0	0	4	0	0	0	1	0	0	0	0	0	1	0	0	0	1	0	2	2	1	1	1	0	0	0	0	0	0	0	0	0
denovo251	52	62	41	No	unknown	GQ268649	95.47	uncultured Russula	Malaysia:Sarawak	Russula16		0	0	0	0	0	0	0	1	0	1	0	0	0	1	0	0	0	0	0	1	0	0	0	0	0	1	0	0	1	1	1	0	0	1	1	0	0	1
denovo2193	52	63	30	No	unknown	HM488511	92.89	uncultured Sebacina	USA:OR	Sebacina3		0	0	0	0	1	0	0	0	0	0	0	0	0	0	1	0	0	0	0	0	0	0	0	0	0	4	0	0	0	0	0	0	0	1	0	0	1	0
denovo1782	48	64	34	No	unknown	EU819537	97.17	Sebacina epigaea	USA:WI	Sebacina1		0	0	0	0	0	0	0	0	0	0	0	1	0	0	0	0	2	0	0	0	0	0	0	1	0	0	0	0	0	0	0	1	3	0	1	0	0	1
denovo2447	48	65	36	No	unknown	EU645600	92.62	uncultured Thelephoraceae	Canada	Thelephoraceae4		0	0	0	0	0	0	2	1	0	0	0	0	0	0	0	0	0	0	0	0	0	0	0	0	1	1	0	0	0	0	0	0	3	0	0	0	0	0
denovo81	46	66	27	No	unknown	UDB016008	99.14	Russula delica	Estonia:Kääriku	Russula4		0	0	0	0	0	0	0	2	0	0	0	0	1	0	0	0	0	2	2	0	0	0	0	0	0	0	0	0	0	1	1	0	0	0	0	0	1	0
denovo225	45	67	26	No	unknown	FJ827210	96.14	uncultured Inocybe	China	Inocybe10		0	0	0	0	0	0	0	0	0	0	0	0	0	1	0	0	0	0	0	1	0	0	0	0	0	0	0	0	0	0	0	0	0	0	0	0	0	0
denovo1788	45	68	31	No	unknown	HE862959	94.77	Inocybe nitidiuscula	Pakistan	Inocybe5		0	0	0	0	0	0	0	1	0	0	0	0	3	0	0	0	0	1	0	1	0	2	0	0	0	0	2	0	0	1	0	1	0	3	2	2	0	1
denovo2814	45	69	27	No	unknown	EF634074	91.43	uncultured Thelephora	New Zealand	Thelephora2		0	0	0	0	0	0	0	0	0	0	0	0	0	1	0	0	0	0	0	0	1	0	0	0	1	0	0	1	0	0	2	0	0	0	0	0	0	0
denovo2425	44	70	31	No	unknown	NA	97.25	148 PR3 B20 DOB2425 No.116 amphinema sp	USA:CA	Amphinema1		0	0	2	0	3	0	0	0	1	0	0	0	0	0	0	0	0	2	0	0	0	0	2	0	0	0	1	0	0	1	1	2	0	0	0	0	1	0
denovo2422	44	71	33	No	unknown	UDB013444	89.18	Cantharellus decolorans	Madagascar	Cantharellus1		0	0	0	0	1	2	0	0	0	0	0	1	0	1	0	0	0	0	0	0	0	2	0	0	1	0	0	0	0	0	0	1	0	0	0	2	0	0
denovo465	44	72	30	No	unknown	UDB015889	99.55	Scleroderma simmanariense	Scotland:Aberdeen	Scleroderma1		0	0	0	0	0	0	0	0	0	0	0	0	0	0	0	0	0	0	0	0	0	0	3	0	0	0	0	0	0	0	0	0	0	0	0	1	0	0
denovo324	44	73	31	No	unknown	AJ889981	95.47	Tomentella bryophila	Denmark:Sjaelland	Tomentella12		0	0	0	1	0	0	0	0	0	0	0	0	0	0	0	0	0	0	0	0	0	0	1	0	1	0	0	0	0	0	0	1	2	0	0	1	0	0
denovo1136	43	74	32	No	unknown	JF273543	91.87	Sebacinales sp EMF42	China:Dujiangyan	Sebacinales1		0	0	0	1	0	0	3	0	0	0	0	0	0	0	3	0	0	0	0	1	0	0	1	1	0	0	0	2	0	0	1	0	0	0	0	0	1	0
denovo2755	42	75	33	No	unknown	KJ831265.1	96.51	Piloderma sp.	Austria	Piloderma5		0	0	0	0	0	0	2	1	0	0	0	1	0	0	0	0	0	1	0	0	0	1	0	0	3	0	0	0	0	0	0	0	3	0	0	1	0	0
denovo908	42	76	27	No	unknown	UDB000117	90.23	Russula virescens	Denmark:Falster	Russula10		0	0	0	2	0	0	0	0	0	0	0	0	0	0	0	0	0	0	0	0	0	1	1	2	0	0	0	0	0	0	0	0	0	2	0	2	0	0
denovo2306	42	77	24	No	unknown	GU452520	99.56	uncultured Wilcoxina	Canada:BC	Wilcoxina1		0	0	0	1	0	0	0	0	0	0	0	0	3	0	0	0	0	0	0	0	0	0	0	0	0	0	0	0	0	0	0	0	0	0	0	1	0	0
denovo619	41	78	27	No	unknown	JN887938	98	uncultured Atheliaceae	Mexico:Morelos	Atheliaceae1		0	0	0	0	0	0	0	1	0	0	0	0	0	0	0	0	0	0	0	0	0	2	0	0	2	0	2	0	0	0	0	3	0	0	0	0	1	0
denovo521	40	79	25	No	unknown	EU293060	90.38	Boletineae sp AW 2007a	Malaysia	Boletineae1		0	0	0	1	1	0	0	2	0	0	0	0	0	0	0	0	0	0	0	0	0	0	2	0	0	0	0	0	0	0	0	0	0	0	0	1	0	0
denovo2771	40	80	32	No	unknown	HQ604806	98.87	Inocybe jacobi	Canada:BC	Inocybe3		0	0	0	0	0	1	0	1	0	0	0	1	0	0	2	0	0	0	0	1	0	0	1	0	0	0	0	0	0	0	0	0	2	0	0	0	0	0
denovo1959	37	81	30	No	unknown	AB453025	91.72	Boletus sp Nan MN23	Thailand:Nan	Boletus1		0	0	0	0	0	0	0	0	0	0	1	0	0	0	0	0	0	0	0	0	0	0	0	0	0	0	0	0	0	0	0	0	2	0	0	1	0	1
denovo29	37	82	20	No	unknown	EU819415	99.6	Clavulina cristata	USA:WI	Clavulina2		0	0	0	0	0	1	2	0	2	0	0	1	0	1	0	0	0	0	0	0	0	0	0	0	0	0	0	0	0	0	0	0	0	0	0	0	0	0
denovo2841	36	83	18	No	unknown	EF218826	97.93	uncultured Tomentella	Canada:BC	Tomentella30		0	0	0	0	0	0	3	0	0	1	0	1	0	0	1	0	0	0	1	0	0	0	4	0	0	0	0	0	0	0	0	0	0	2	4	0	0	0
denovo2880	35	84	27	No	unknown	AF158018	99.24	Rhizopogon rubescens	USA:CA	Rhizopogon1		0	0	0	0	0	0	0	0	0	0	0	3	0	0	0	0	1	0	0	0	0	1	0	0	0	0	0	0	0	0	3	0	1	3	2	1	0	0
denovo2441	35	85	21	No	unknown	JN887953.1	95.9	Inocybe sp.	USA:AK	Inocybe13		0	0	0	0	0	1	0	1	0	0	0	0	0	0	0	0	0	0	0	0	0	2	0	0	0	0	0	0	0	0	1	0	0	0	3	0	0	0
denovo3016	34	86	28	No	unknown	UDB011217	97.13	Russula griseascens	Estonia:Viidu	Russula5		0	1	0	0	0	0	0	0	0	0	0	0	0	0	0	0	0	0	0	0	0	0	0	0	0	0	0	0	0	2	0	0	0	0	0	0	0	1
denovo627	32	87	22	No	unknown	AB636458	99.63	uncultured Inocybe	China:Hunan	Inocybe11		0	0	0	0	0	0	0	0	0	0	0	0	0	0	0	0	0	0	0	0	0	0	0	0	1	0	0	0	0	0	1	0	0	0	0	0	0	0
denovo2881	32	88	24	No	unknown	AY456351	98.03	Lactarius sp NC 1 6000	USA	Lactarius5		0	0	0	0	0	3	0	0	0	0	0	0	0	0	0	0	0	0	0	0	1	0	0	0	0	0	0	0	0	0	0	0	0	0	0	0	0	0
denovo349	32	89	21	No	unknown	UDB016037	98.21	Russula pelargonia	Finland:Ruissalo	Russula7		0	0	0	0	0	1	1	0	0	0	0	0	0	0	0	0	0	0	0	0	0	0	0	0	0	1	0	0	0	0	0	0	0	0	0	0	0	0
denovo2146	31	91	20	No	unknown	EU668947	98.76	uncultured Tomentella	Estonia:Varska	Tomentella26		0	0	0	0	0	0	0	0	0	0	0	0	0	0	0	0	0	0	0	0	0	0	0	0	0	0	0	0	0	0	0	0	0	0	0	0	0	0
denovo78	31	90	22	Yes	no	GQ398241	93.75	Alnicola OTU1	USA:OR	Alnicola2		1	1	0	0	0	0	0	0	0	2	0	0	0	0	0	0	0	0	0	0	0	0	0	0	0	0	0	0	0	0	0	0	0	0	0	0	0	1
denovo2680	29	92	14	No	unknown	JN942787	98.52	Laccaria cf laccata C KH 2011	Japan	Laccaria1		0	0	0	0	0	0	0	1	0	0	0	0	0	2	0	0	0	0	0	0	0	0	0	0	0	0	0	0	0	0	0	0	0	0	0	0	0	0
denovo1982	27	93	18	No	unknown	JQ393124.1	97.95	Sphaerosporella sp.	USA	Sphaerosporella1		0	0	0	0	0	0	0	0	0	0	0	0	1	0	0	0	0	0	0	0	0	0	0	0	0	0	0	0	0	0	0	0	0	0	0	1	0	0
denovo1357	27	94	20	No	unknown	EU819421	99.56	Russula aeruginea	USA:WI	Russula1		0	0	0	0	0	0	0	0	0	0	0	0	0	0	0	2	0	0	0	0	0	1	0	0	0	0	0	0	0	0	0	0	0	0	0	0	0	0
denovo2054	26	95	13	No	unknown	AY878660	92.55	uncultured Russula	USA:CA	Russula13		0	0	0	0	0	0	0	0	0	0	0	0	0	0	0	0	0	0	0	0	0	0	0	1	1	0	0	0	0	0	0	0	3	0	0	0	0	0
denovo2143	26	96	20	No	unknown	EU819524	96.71	Tomentella ferruginea	USA:WI	Tomentella14		0	0	1	0	0	0	0	0	0	0	0	0	0	0	0	0	0	0	0	1	0	0	0	0	0	0	0	0	0	0	0	0	0	3	0	0	0	0
denovo2864	26	97	18	No	unknown	KF484437.1	89.87	Clavulina sp.	Japan	UnculturedECM8		0	0	0	0	0	0	0	0	0	0	0	0	0	0	0	0	0	0	0	0	0	0	0	0	0	0	0	0	2	0	0	0	0	0	0	2	0	0
denovo653	25	98	1	No	unknown	AF440645	97.1	uncultured endomycorrhiza of Neottia nidus avis	NA	Sebacinales6		0	0	0	0	0	0	0	0	0	0	0	0	0	0	0	0	0	0	0	0	0	0	0	0	0	0	0	0	0	0	0	0	0	0	0	0	0	0
denovo2004	24	99	16	No	unknown	FJ596857.1	100	Laccaria proxima	USA:TN	Laccaria3		0	0	0	0	0	0	0	0	2	0	0	0	0	0	0	0	0	0	0	2	0	0	0	0	0	0	0	0	0	0	0	0	0	0	0	0	0	0
denovo84	24	100	18	No	unknown	AJ236078.2	96	Cortinarius paleaceus	Norway: Oslo	Cortinarius13		0	0	0	0	0	0	0	0	0	0	1	0	0	0	0	1	0	0	1	0	0	0	0	0	1	0	0	0	0	0	2	0	0	1	2	0	0	0
denovo1014	24	101	18	No	unknown	DQ517417	99.49	Hygrophorus gliocyclus	USA:WY	Hygrophorus1		0	0	0	0	0	0	0	0	3	0	0	0	0	0	0	0	0	0	0	0	0	0	0	0	0	1	0	0	0	0	0	0	0	0	1	0	0	0
denovo2253	24	102	13	No	unknown	AM161532	97.17	uncultured Sebacinaceae	Denmark:Zealand	Sebacinaceae4		0	0	0	0	0	0	0	1	0	0	0	0	0	0	0	0	0	0	0	0	0	0	0	3	0	0	0	0	0	0	0	0	0	0	0	0	0	0
denovo1206	23	103	11	No	unknown	JQ272355	100	Meliniomyces sp 1 RB_2011	USA:TN	Meliniomyces1		0	0	0	0	0	0	0	1	0	0	0	4	0	0	0	0	0	0	0	0	0	0	10	0	0	0	0	0	1	0	0	0	0	0	0	0	0	0
denovo1579	23	104	16	No	unknown	AB291763.1	93	Russula densifolia	Japan	Russulaceae5		0	0	0	0	0	0	0	0	0	0	0	1	0	0	0	0	0	0	0	0	0	0	0	0	0	0	0	0	0	0	0	0	0	0	0	0	0	1
denovo2	23	105	18	No	unknown	FJ845437.1	99.57	Russula cessans	Canada:BC	Russula20		0	0	0	0	0	0	0	0	0	0	0	0	0	0	0	0	0	0	0	0	0	0	0	0	0	1	0	0	0	0	0	0	0	0	0	0	0	1
denovo2914	23	106	15	No	unknown	GU327400	98.7	uncultured Wilcoxina	Czech Republic:Cepice	Wilcoxina2		0	0	0	0	0	0	0	1	0	0	0	1	0	0	0	0	0	0	0	0	0	0	5	0	0	0	0	0	0	0	0	2	0	0	0	0	0	0
denovo2741	22		12	No	yes	GQ268643	97.02	uncultured Russula	Malaysia:Sarawak	Russula18		0	0	0	0	0	0	0	0	0	0	0	0	1	0	0	0	0	0	0	1	0	0	0	0	0	0	0	0	0	0	2	0	0	0	0	0	0	0
denovo716	22	107	18	Yes	no	GQ398249	94.61	Tomentella OTU2	USA:OR	Tomentella4		0	0	1	0	0	0	0	0	0	0	0	0	0	0	0	0	0	0	0	0	0	0	1	0	0	0	0	0	0	0	0	0	0	0	0	0	0	0
denovo2493	21	108	16	No	unknown	GQ268667	94.44	uncultured Tomentella	Malaysia:Sarawak	Tomentella29		0	0	0	0	1	0	0	0	0	0	0	0	0	0	0	0	0	0	0	0	0	0	0	0	0	0	0	0	0	0	0	0	0	0	0	0	0	1
denovo321	20	109	18	No	unknown	AB636416	96.76	uncultured Agaricomycetidae - ECM root-tips	China:Hunan	Agaricales3		0	0	0	1	0	1	0	0	0	0	0	0	0	0	0	0	0	0	0	0	0	0	2	0	0	0	0	0	0	0	0	0	0	0	0	0	0	0
denovo524	20	110	12	No	unknown	GQ162811	96.63	Amphinema diadema	Norway	Amphinema3		0	0	0	0	0	0	0	3	1	0	0	0	0	0	0	0	0	0	0	0	0	0	0	0	2	0	0	0	3	0	0	1	0	0	0	0	0	0
denovo1364	19	111	17	No	unknown	FJ553778.1	99	Amphinema sp.	Canada:BC	Amphinema5		0	0	0	0	0	0	0	0	0	0	0	1	0	0	0	1	0	0	0	2	0	1	0	0	0	0	0	0	0	0	0	0	1	0	0	1	0	0
denovo1594	19	112	13	No	unknown	GU998313	98.02	uncultured Russula	USA:AK	Russula12		0	0	0	0	0	1	0	0	0	0	0	0	0	0	0	0	0	1	0	0	0	0	0	0	0	0	0	0	0	0	0	0	0	0	1	0	0	0
denovo432	19	113	15	No	unknown	FJ210775	94.61	uncultured Tomentella	Italy:Ferrara	Tomentella32		0	0	0	1	0	0	0	0	0	0	0	0	0	0	0	0	0	1	0	0	0	0	0	0	0	0	0	0	0	0	0	0	0	0	0	0	0	0
denovo2241	18		15	No	yes	GQ268608	98.94	uncultured Cortinarius	Malaysia:Sarawak	Cortinarius11		0	0	0	0	0	1	0	0	0	0	0	0	2	0	0	0	0	0	0	0	0	0	0	0	0	0	0	1	0	0	0	0	0	0	0	0	0	0
denovo1233	18		11	No	yes	GQ268669	99.17	uncultured Tomentella	Malaysia:Sarawak	Tomentella17		0	0	0	0	0	0	0	0	0	0	0	2	0	0	0	0	0	0	0	0	0	0	0	0	0	0	0	0	0	1	0	0	0	0	0	0	0	0
denovo2605	18	114	15	No	unknown	FJ196945	98.59	uncultured Russula	Mexico:Guerrero	Russula17		0	0	0	0	2	0	0	0	0	0	0	0	0	0	0	0	0	0	1	0	0	0	0	0	0	0	0	0	0	0	0	0	0	0	0	1	0	0
denovo360	18	115	11	No	unknown	FJ845429	98.77	Russula brevipes	Canada:BC	Russula2		0	0	1	0	0	0	0	0	0	0	0	0	1	0	0	0	0	2	0	0	0	0	0	0	0	0	0	0	0	0	0	0	0	0	0	0	0	0
denovo1163	18	116	14	No	unknown	HM488511	95.22	uncultured Sebacina	USA:OR	Sebacina2		0	0	0	0	0	0	0	0	0	0	0	0	0	0	1	0	0	0	0	2	0	0	0	0	0	0	0	0	0	0	0	0	0	0	0	0	0	0
denovo4	18	117	12	No	unknown	AY748885	98.35	uncultured Thelephoraceae	Germany	Thelephoraceae6		0	0	0	0	1	0	0	0	0	0	0	0	0	4	0	0	0	0	0	0	0	0	0	0	0	0	0	0	0	0	0	0	0	0	0	0	0	0
denovo2562	17	118	13	No	unknown	HM146831	99.64	uncultured Laccaria	NA	Laccaria2		0	0	0	0	1	2	0	0	0	0	0	0	0	0	0	0	0	0	0	1	0	0	0	0	1	0	0	0	0	0	1	2	0	0	0	0	0	0
denovo1220	17	119	11	No	unknown	AB327181.1	99	Inocybe lacera	Japan:Hokkaido	Inocybe14		0	0	0	0	0	0	0	0	0	0	0	0	0	0	0	0	0	0	0	0	0	0	0	0	0	0	0	0	0	0	0	1	0	0	0	0	0	0
denovo2757	16	120	9	No	unknown	GU553371	98.41	uncultured Suillus	USA:OH	Suillus1		0	0	0	0	0	0	0	0	0	0	0	0	0	0	0	0	0	0	0	0	0	1	0	0	0	0	0	0	0	0	0	0	6	0	0	0	0	0
denovo2001	15		13	No	yes	GQ268574	99.2	uncultured Atheliales	Malaysia:Sarawak	Atheliales1		0	0	0	1	0	0	0	0	1	0	0	0	0	0	0	0	0	0	0	0	0	0	0	0	0	0	0	0	0	0	0	0	0	0	0	1	0	0
denovo1896	15	121	13	No	unknown	KC967403.1	98	Cenococcum geophilum	China	Cenococcum1		0	0	0	0	0	2	0	0	0	0	0	0	0	0	0	0	0	0	0	0	0	0	2	0	0	1	0	0	0	0	0	1	0	0	0	0	0	0
denovo530	15	122	12	No	unknown	GQ268574	92.49	uncultured Atheliales	Malaysia:Sarawak	Atheliales2		0	0	0	0	0	0	0	0	0	0	0	0	0	0	0	0	0	0	0	0	0	1	0	0	0	0	0	0	0	0	0	0	0	0	0	0	0	0
denovo2015	15	123	10	No	unknown	EU645626	97.16	uncultured Sebacinaceae	Canada	Sebacinaceae3		0	0	0	0	0	0	0	0	0	0	0	0	0	0	0	0	0	0	0	0	0	0	0	0	3	0	0	0	0	0	0	0	0	1	0	3	0	1
denovo726	15	124	11	No	unknown	AJ889982	90.69	Tomentella cf sublilacina	Denmark:Lellinge	Tomentella13		0	0	0	0	0	1	0	0	0	0	0	0	0	0	2	0	0	0	0	0	0	0	0	0	0	0	1	0	0	0	0	0	0	0	0	0	0	0
denovo1573	15	125	11	No	unknown	JQ711813.1	93.33	Tomentella sp.	Canada:BC	Tomentella36		0	0	0	0	0	0	0	0	0	0	0	0	0	0	0	0	0	0	0	0	0	3	0	1	0	0	0	0	1	0	0	0	0	0	0	0	0	0
denovo2061	14	126	10	No	unknown	HM488556	99.57	uncultured Piloderma	USA:OR	Piloderma2		0	0	0	0	0	0	0	0	0	0	0	0	0	0	0	0	0	0	2	0	0	0	0	0	0	2	0	0	0	0	0	0	0	0	0	0	0	0
denovo1743	14	128	9	No	unknown	EU819523	98.34	Tomentella stuposa	USA:WI	Tomentella11		0	0	0	0	0	0	0	0	0	0	0	0	0	0	0	0	0	0	1	0	0	0	0	0	0	0	0	0	0	0	1	0	0	0	1	0	1	0
denovo336	14	129	11	No	unknown	DQ517360.1	98.4	Pseudotomentella	USA:MT	Pseudotomentella1		0	0	0	0	0	1	0	0	0	0	0	0	0	0	1	0	0	0	0	0	0	0	0	0	0	0	0	0	0	0	0	0	0	0	0	0	0	0
denovo980	14	127	12	Yes	no	GQ398250	93.42	Tomentella OTU3	USA:OR	Tomentella10		0	0	0	0	0	0	1	0	0	0	0	0	0	0	0	0	0	0	0	0	0	0	0	0	0	0	0	0	0	0	0	1	0	0	0	1	0	0
denovo2778	13	130	10	No	unknown	HQ604250	99.05	Inocybe pusio	Canada:BC	Inocybe7		0	0	0	0	0	0	2	0	0	0	0	0	0	0	0	0	0	0	0	0	0	0	0	0	0	0	0	0	0	0	0	0	0	0	0	0	0	0
denovo2836	13	131	11	No	unknown	JX844772.1	99.58	Sebacina sp. - from root-tip	Germany	Sebacina6		0	0	0	0	0	0	0	0	0	0	0	0	1	0	0	0	0	0	1	0	0	0	0	0	0	0	0	0	0	0	0	0	0	0	0	0	2	0
denovo1368	12	132	9	No	unknown	HQ650731	99.5	Hygrophorus purpurascens	Canada:BC	Hygrophorus3		0	0	0	0	0	0	0	0	0	0	0	0	0	0	0	0	0	0	0	0	0	0	0	0	1	0	0	0	0	0	2	0	0	0	0	0	0	1
denovo3052	12	133	9	No	unknown	JQ003619	99.56	Phylloporus bogoriensis	Malaysia	Phylloporus1		0	0	0	0	0	0	0	0	0	0	0	0	0	0	0	0	0	0	0	1	0	0	0	0	0	0	0	0	0	0	0	0	0	0	0	0	0	0
denovo2934	12	134	10	No	unknown	HM036641.1	98	Wilcoxina sp.	Lithuania	Wilcoxina3		0	0	0	0	0	0	0	0	0	0	0	0	1	0	0	0	0	0	0	0	0	0	0	0	0	2	0	0	0	0	0	0	0	0	1	0	0	0
denovo1219	12	135	8	No	unknown	EF634074	91.77	uncultured Thelephora	New Zealand	Thelephora1		0	0	0	0	0	0	0	0	0	0	0	0	0	0	0	0	0	0	0	0	0	0	2	0	0	0	0	0	0	0	0	0	0	0	0	0	0	0
denovo2859	12	136	9	No	unknown	EF634074	90.57	uncultured Thelephora	New Zealand	Thelephora3		0	0	0	0	0	0	0	1	0	0	0	0	0	0	1	0	0	0	0	0	0	0	0	0	0	0	0	0	0	0	0	0	1	0	1	0	0	0
denovo903	12	137	5	No	unknown	JF748095	95.06	uncultured Tomentella	China	Tomentella35		0	0	0	0	0	0	0	0	0	0	0	0	0	0	0	0	0	0	0	0	0	0	0	0	0	0	0	0	0	2	0	0	0	0	0	0	0	2
denovo2280	12	139	2	No	unknown	GQ398249.1	99.13	Tomentella sp.	Canada	Tomentella37		0	0	0	0	0	0	0	0	0	0	0	0	0	0	0	0	0	0	0	0	0	0	0	0	0	0	0	0	0	0	0	0	0	0	0	0	0	0
denovo1851	12	138	12	Yes	no	GQ398250	95.51	Tomentella OTU3	USA:OR	Tomentella5		0	0	0	0	0	0	0	0	0	0	0	0	0	0	0	0	0	1	0	1	0	0	0	0	0	0	0	0	0	0	0	0	0	0	0	0	0	0
denovo2069	11		8	No	yes	GQ268598	98.85	uncultured Clavulinaceae	Malaysia:Sarawak	Clavulinaceae1		0	0	0	0	0	0	0	0	1	0	0	0	0	0	0	0	0	0	0	0	0	0	0	0	0	0	0	0	0	0	0	0	0	0	0	0	0	0
denovo1218	11		9	No	yes	GQ268669	97	uncultured Tomentella	Malaysia:Sarawak	Tomentella16		0	0	0	0	0	0	0	0	0	0	0	0	0	0	0	0	0	0	0	0	0	0	0	0	0	0	0	0	0	0	0	0	0	0	0	0	0	0
denovo194	11	140	8	No	unknown	AJ889946	91.2	Cortinarius cf decipiens	Denmark:Sjaelland	Cortinarius4		0	0	0	0	0	0	0	0	0	0	0	0	0	0	0	0	0	0	0	0	0	0	0	0	0	0	0	0	0	0	0	0	0	0	2	0	0	0
denovo2372	11	141	8	No	unknown	AJ534902.1	99.56	Piloderma sp.	Estonia	Piloderma6		0	0	0	0	0	0	0	0	0	0	0	0	0	0	0	0	0	0	0	1	0	0	0	0	0	0	0	0	0	0	0	0	0	0	1	0	0	0
denovo2538	11	142	5	No	unknown	FJ553778.1	99.03	Amphinema sp.	Canada	Amphinema6		0	0	0	0	0	0	0	0	0	0	0	0	0	0	0	0	0	0	0	0	0	0	0	0	0	0	2	0	0	0	0	0	0	0	0	0	0	0
denovo686	10	143	7	No	unknown	EF126734	89.64	Russula subnigricans	NA	Russula9		0	0	0	0	0	0	0	0	0	0	0	0	0	0	0	0	0	0	0	0	0	0	0	0	0	0	0	0	0	0	0	1	0	0	3	0	0	0
denovo1276	10	144	8	No	unknown	JF748067	94.47	uncultured Thelephoraceae	China	Thelephoraceae3		0	0	0	0	0	0	0	0	0	0	0	1	0	0	0	0	0	0	0	0	0	0	0	0	0	0	0	0	0	0	0	0	0	0	0	0	0	0
denovo859	10	145	8	Yes	no	GQ398250	95.04	Tomentella OTU3	USA:OR	Tomentella8		0	0	0	0	0	0	0	0	0	0	0	0	0	0	0	0	0	0	0	0	0	0	0	0	0	0	0	0	0	0	0	0	0	0	0	0	0	0
denovo2728	9	146	8	No	unknown	UDB013444	94.78	Cantharellus decolorans	Madagascar	Cantharellus2		0	0	0	0	0	0	0	0	0	0	0	0	0	0	0	0	0	0	0	0	0	0	0	0	0	0	0	0	0	0	0	0	0	0	0	0	0	0
denovo1796	9	147	8	No	unknown	EU024886	96.8	vouchered mycorrhizae (Humaria)	Hungary	Humaria1		0	0	0	0	1	0	0	0	0	0	0	0	0	0	0	0	0	0	0	0	0	0	1	0	0	0	0	0	1	0	0	0	0	0	0	0	0	0
denovo1474	9	148	4	No	unknown	HQ604403	98.36	Inocybe chelanensis	Canada:BC	Inocybe2		0	0	0	0	0	0	0	0	0	0	0	0	0	0	0	0	0	0	0	0	0	0	0	0	0	0	0	0	0	0	0	0	0	0	0	0	0	0
denovo666	9	149	5	No	unknown	HQ336697	97.93	uncultured Thelephoraceae	Germany	Thelephoraceae7		0	0	0	0	0	0	0	0	0	0	0	0	0	0	0	0	0	0	0	0	0	0	0	0	0	0	0	0	0	0	0	0	0	0	0	0	0	0
denovo2100	8		5	No	yes	GQ268640	99.15	uncultured Russulaceae	Malaysia:Sarawak	Russulaceae1		0	0	0	0	0	0	0	0	0	0	0	0	0	0	0	0	0	0	0	0	0	0	0	0	0	0	0	0	0	0	0	0	0	0	0	0	0	0
denovo1729	8	150	6	No	unknown	AY669681	94.2	Cortinarius malachius	NA	Cortinarius7		0	0	0	0	0	0	0	0	0	0	0	0	0	0	0	0	0	0	0	0	0	0	0	0	0	0	0	0	0	0	0	0	0	0	0	0	0	0
denovo2321	8	151	7	No	unknown	FN550902	93.98	Inocybe cf hirtella EL707	Spain	Inocybe1		0	0	0	0	0	0	0	0	0	0	0	0	0	0	0	0	0	0	1	0	0	0	0	0	0	0	0	0	0	0	0	1	0	0	1	0	0	0
denovo2268	8	152	8	No	unknown	DQ061882	97.48	uncultured Russulaceae	France: Corsica	Russulaceae2		0	0	0	0	0	0	0	0	0	0	0	0	0	0	0	0	0	0	0	0	0	0	0	0	0	0	0	0	0	0	0	0	0	0	1	0	0	0
denovo1794	7	154	6	No	unknown	GU234060	99.51	Cortinarius tenebricus	NA	Cortinarius8		0	0	0	0	0	0	0	0	0	0	0	0	0	1	0	0	0	1	0	0	1	1	0	0	0	0	0	0	0	0	0	0	0	0	0	0	0	0
denovo2331	7	155	5	No	unknown	GQ219896	94.84	uncultured Sebacina	Germany:Hainich	Sebacina4		0	0	0	0	0	0	0	0	0	0	0	0	0	0	0	0	0	0	0	0	0	0	0	0	0	0	0	0	0	0	0	0	0	0	0	0	0	0
denovo1331	7	156	6	No	unknown	JF273543	86.47	Sebacinales sp EMF42	China:Dujiangyan	Sebacinales2		0	0	0	0	0	0	0	0	0	0	0	0	0	0	0	0	0	0	0	0	0	0	0	0	0	0	0	0	0	0	1	0	0	0	0	0	0	0
denovo2537	7	153	7	Yes	no	GQ398241	89.66	Alnicola OTU1	USA:OR	Alnicola3		0	0	0	0	0	0	0	0	0	0	0	0	0	0	0	0	0	0	0	0	0	0	0	0	0	0	0	1	0	0	0	0	0	0	0	0	0	0
denovo94	6		4	No	yes	GQ268625	96.59	uncultured Polyporales	Malaysia:Sarawak	Polyporales1		0	0	0	0	0	0	0	0	0	0	0	0	0	0	0	0	0	0	0	0	0	0	0	0	0	0	0	0	0	0	0	1	2	0	0	0	0	0
denovo2987	6	157	2	No	unknown	UDB002211	100	Cortinarius acutus	Sweden:Bispgården	Cortinarius3		0	0	0	0	0	0	0	0	0	0	0	0	0	0	0	0	0	0	0	0	0	0	0	0	0	0	0	0	0	0	0	0	0	0	0	0	0	0
denovo2546	6	158	3	No	unknown	HM189748	99.51	Genea hispidula	NA	Genea1		0	0	0	0	0	0	0	0	0	0	0	0	0	3	0	0	0	0	0	0	0	0	0	0	0	0	0	0	0	0	0	0	0	0	0	0	0	0
denovo2079	6	159	6	No	unknown	GQ268649	92.56	uncultured Russula	Malaysia:Sarawak	Russula14		0	0	0	0	0	0	0	0	0	0	0	0	0	0	0	1	0	0	0	0	0	0	0	0	0	0	0	0	0	0	0	0	0	0	0	0	0	0
denovo729	5	160	4	No	unknown	NA	95.85	148 PR3 B20 DOB2425 No.116 amphinema sp	USA:OR	Amphinema2		0	0	0	0	0	0	0	0	0	0	0	0	0	0	0	0	0	0	0	0	0	0	0	0	0	0	0	1	0	0	0	0	0	0	0	0	0	0
denovo1620	5	161	2	No	unknown	JF908710.1	95	Russula dryadicola	Italy	Russula21		0	0	0	0	0	0	0	0	0	0	0	0	0	0	0	0	0	0	0	0	0	0	0	0	0	0	0	0	0	0	0	0	0	0	0	0	0	0
denovo2896	5	162	4	No	unknown	AY456339	99.2	Clavulina cinerea	USA	Clavulina1		0	0	0	0	0	0	0	0	0	0	0	0	0	0	0	0	0	0	0	0	0	0	0	0	0	0	0	0	0	0	0	0	0	1	0	1	0	0
denovo1572	5	163	4	No	unknown	EU523564	98.3	Inocybe sp PBM 2604	USA TN	Inocybe8		0	0	0	0	0	0	0	0	0	0	0	0	0	0	0	0	0	0	0	0	0	0	2	0	0	0	0	0	0	0	0	0	0	0	0	0	0	0
denovo1412	5	164	3	No	unknown	GU180336	99.18	uncultured Tomentella	USA:CA	Tomentella19		0	0	0	0	0	0	0	0	0	0	0	0	0	0	0	0	0	0	0	0	0	0	0	0	0	0	0	0	0	0	0	0	0	0	0	0	0	0
denovo2916	4	165	3	No	unknown	FJ827238	99.57	uncultured Russula	China	Russula19		0	0	0	0	0	0	0	0	0	0	0	0	0	0	0	0	0	0	0	0	0	0	0	0	0	0	0	0	0	0	0	1	0	0	0	0	0	0
denovo1058	4	166	4	No	unknown	HQ336697	95.1	uncultured Thelephoraceae	Germany	Thelephoraceae2		0	0	0	0	0	0	0	0	0	0	1	0	0	0	1	0	0	0	0	0	0	1	0	0	0	0	0	0	0	0	0	0	0	0	0	0	0	0
denovo1385	4	168	4	No	unknown	HQ022003.1	92	Russula sp.	USA:NH	Russula22		0	0	0	0	0	0	0	0	0	0	0	0	0	0	0	0	0	0	0	0	0	0	0	0	0	0	0	0	0	0	0	0	0	0	0	0	0	0
denovo2839	4	169	2	No	unknown	DQ990870.1	96	Cantharellales	Italy	Cantharellales1		0	0	0	0	3	0	0	0	0	0	0	0	0	0	0	0	0	0	0	0	0	0	0	0	0	0	0	0	0	0	0	0	0	0	0	0	0	0
denovo683	4	170	4	No	unknown	HQ022267.1	98.71	Russula sp.	USA:NH	Russula23		0	0	0	0	0	0	0	0	0	0	0	0	0	0	0	0	0	0	0	0	0	0	0	0	0	0	0	0	0	0	0	0	0	0	0	1	0	0
denovo763	4	171	3	No	unknown	AF323111.1	99.58	Tomentella sublilacina	USA:OR	Tomentella38		0	0	0	0	0	0	0	0	0	0	0	0	0	0	0	0	0	0	0	0	0	0	0	0	0	0	0	0	0	0	0	0	0	0	0	0	0	0
denovo2611	4	167	4	Yes	no	GQ398250	90.2	Tomentella OTU3	USA:OR	Tomentella6		0	0	0	0	0	0	0	0	0	0	0	0	0	0	0	0	0	0	0	0	0	0	0	0	0	0	0	0	0	0	0	0	0	0	0	0	0	0
denovo2357	3	172	3	No	unknown	NA	97.52	165 434 OR3 C10 DOB-1334 No.177 corticiaceae	USA:AK	Corticiaceae1		0	0	0	0	0	0	0	0	0	0	0	0	0	0	0	0	0	0	0	0	0	0	0	0	0	0	0	0	0	0	0	0	0	0	0	0	0	0
denovo1610	3	173	2	No	unknown	KC702652.1	94.92	Speudotomentella sp.	USA:AK	Thelephoraceae9		0	0	0	0	0	0	0	0	0	0	0	0	0	0	0	0	0	0	0	0	0	0	0	0	0	0	0	0	0	0	0	0	0	0	0	0	0	0
denovo2323	2	174	2	No	unknown	AB291755.1	97	Russula densifolia	Japan	Russula24		0	0	0	0	0	0	0	0	0	0	0	0	0	0	0	0	0	0	0	0	0	0	0	0	0	0	0	0	0	0	0	0	0	0	0	0	0	0
denovo777	1	175	1	No	unknown	FJ803946	100	uncultured Cortinarius	China:Mongolia	Cortinarius12		0	0	0	0	0	0	0	0	0	0	0	0	0	0	0	0	0	0	0	0	0	0	0	0	0	0	0	0	0	0	0	0	0	0	0	0	0	0
[truncated: 156 more columns]
